# Supplementary material for: Anti-CRISPR protein AcrIF4 inhibits the type I-F CRISPR-Cas surveillance complex by blocking nuclease recruitment and DNA cleavage
Source: PubMed Central journal article supplement — J Biol Chem. 2022 Oct 7;298(11):102575. doi: 10.1016/j.jbc.2022.102575 (PMC9637919; doi:10.1016/j.jbc.2022.102575), 2022-10-07
Supplement: mmc1.pdf [file mmc1.pdf]

**Table S1. Cryo-EM data collection, refinement, and validation statistics**

|                                                     | Csv-AcrIF4-dsDNA-overall            | Csv-AcrIF4-dsDNA-Cas8f | Csv-AcrIF4-dsDNA-Cas6f |
|-----------------------------------------------------|-------------------------------------|------------------------|------------------------|
| <b>Data collection and processing</b>               |                                     |                        |                        |
| EMDB code                                           | EMD-33837                           |                        |                        |
| PDB code                                            | 7YHS                                |                        |                        |
| Electron microscopy                                 |                                     | Titan Krios            |                        |
| Camera                                              |                                     | K3                     |                        |
| Magnification                                       |                                     | 29000×                 |                        |
| Voltage                                             |                                     | 300 kV                 |                        |
| Defocus range (μm)                                  |                                     | -1.3 to -1.8           |                        |
| Electron exposure (e <sup>-</sup> /Å <sup>2</sup> ) |                                     | 50                     |                        |
| Pixel size (Å)                                      |                                     | 0.97                   |                        |
| Exposure rate (e <sup>-</sup> /Å <sup>2</sup> /sec) |                                     | 20                     |                        |
| Number of frames per movie                          |                                     | 32                     |                        |
| Automation software                                 |                                     | SerialEM               |                        |
| Micrographs collected                               |                                     | 839                    |                        |
| Data processing software                            |                                     | RELION 3.1             |                        |
| Symmetry imposed                                    | C1                                  | C1                     | C1                     |
| Total extracted particles                           |                                     | 621,597                |                        |
| Total refined particles                             | 117,510                             | 49,498                 | 93,188                 |
| Final particles                                     | 117,510                             | 49,498                 | 93,188                 |
| Map resolution (FSC=0.143/Å)                        | 3.37                                | 3.59                   | 3.96                   |
| Local resolution range (Å)                          | 2.4-4.4                             | 2.4-4.4                | 3.2-5.4                |
| <b>Refinement</b>                                   |                                     |                        |                        |
| Initial Model (PDB code)                            | 6NE0                                |                        |                        |
| Refinement Package                                  | Phenix 1.19 (real space refinement) |                        |                        |
| Model resolution (FSC=0.5/Å)                        | 3.43                                |                        |                        |
| Map sharpening B factor (Å <sup>2</sup> )           | -20                                 |                        |                        |
| Map CC                                              | 0.64                                |                        |                        |
| Model composition                                   |                                     |                        |                        |
| Non-hydrogen atoms                                  | 24,082                              |                        |                        |
| Protein residues                                    | 2949                                |                        |                        |
| Nucleotides                                         | 109                                 |                        |                        |
| <i>B</i> factors (Å <sup>2</sup> )                  |                                     |                        |                        |
| Protein                                             | 28.37                               |                        |                        |
| Nucleotides                                         | 55.24                               |                        |                        |
| R.m.s. deviations                                   |                                     |                        |                        |
| Bond lengths (Å)                                    | 0.008                               |                        |                        |
| Bond angles (°)                                     | 1.137                               |                        |                        |
| <b>Validation</b>                                   |                                     |                        |                        |
| MolProbity score                                    | 2.54                                |                        |                        |
| EMRinger score                                      | 1.68                                |                        |                        |
| Clash score                                         | 7.89                                |                        |                        |
| Poor rotamers (%)                                   | 7.02                                |                        |                        |
| C-beta deviations                                   | 0                                   |                        |                        |
| CaBLAM outliers                                     | 5.41                                |                        |                        |
| Ramachandran plot (%)                               |                                     |                        |                        |
| Favored                                             | 92.42                               |                        |                        |
| Allowed                                             | 7.55                                |                        |                        |

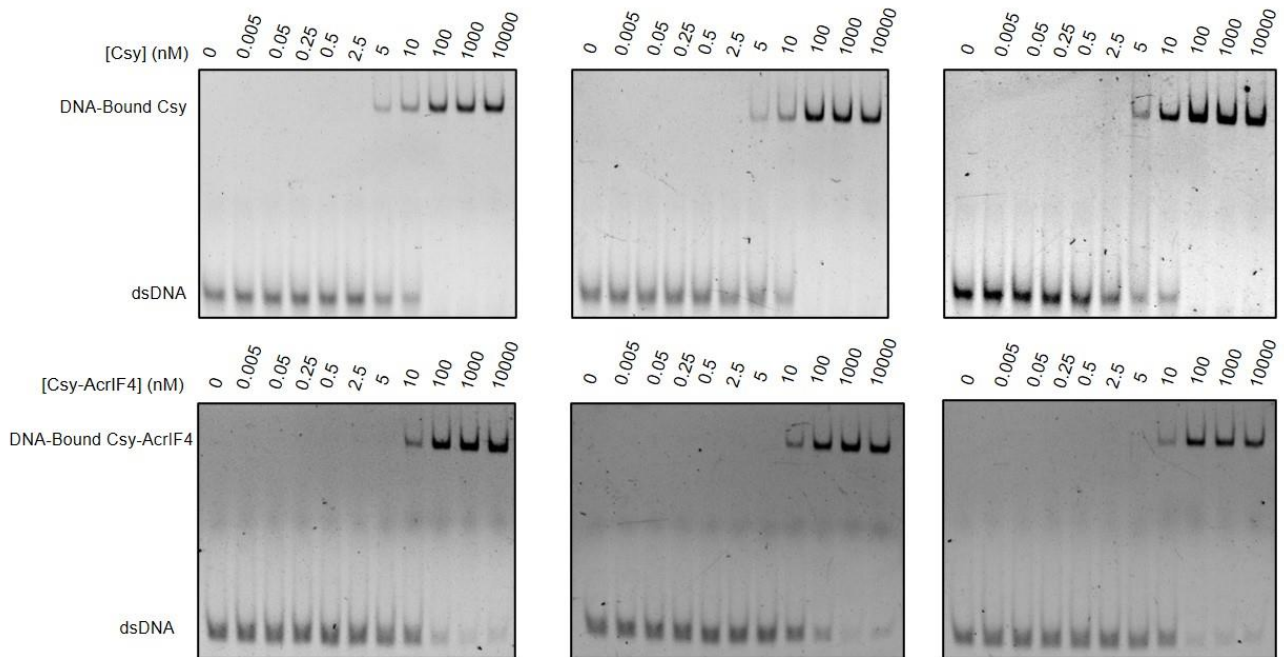

**Figure S1 Binding between dsDNA and the AcrIF4-bound or apo Csy complex**

DNA binding assays were performed by incubating a concentration gradient (0, 0.005, 0.05, 0.25, 0.5, 2.5, 5, 10, 100, 1000, 10000 nM) of the Csy (or Csy-AcrIF4) complex with 16 nM of 54 bp dsDNA (5'-FAM in the TS).

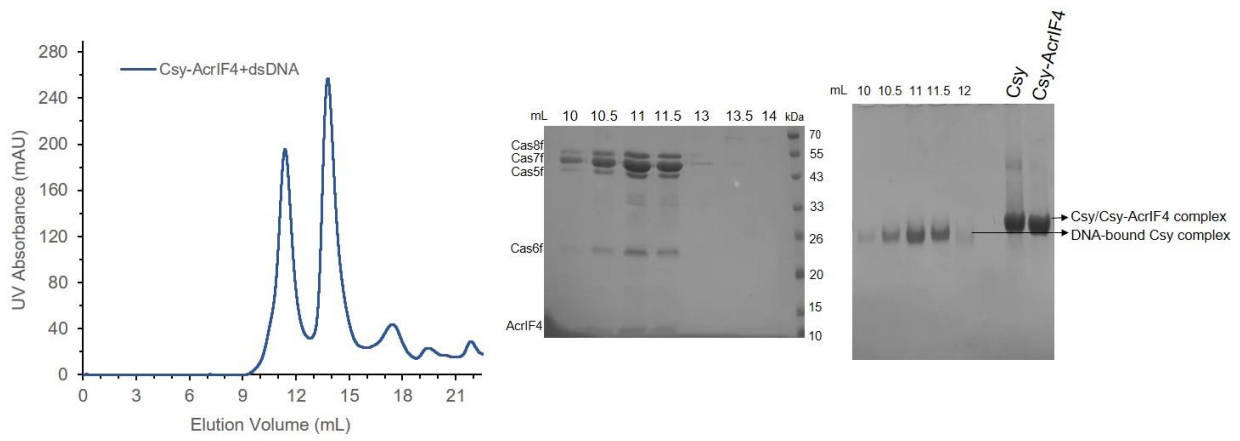

**Figure S2 dsDNA co-elutes with the Csy-AcrIF4 complex**

Gel filtration profiles of the mix of Csy-AcrIF4/dsDNA. The UV absorbance at 280 nm is shown. The SDS-PAGE and native PAGE of the peak fractions are shown on the right.

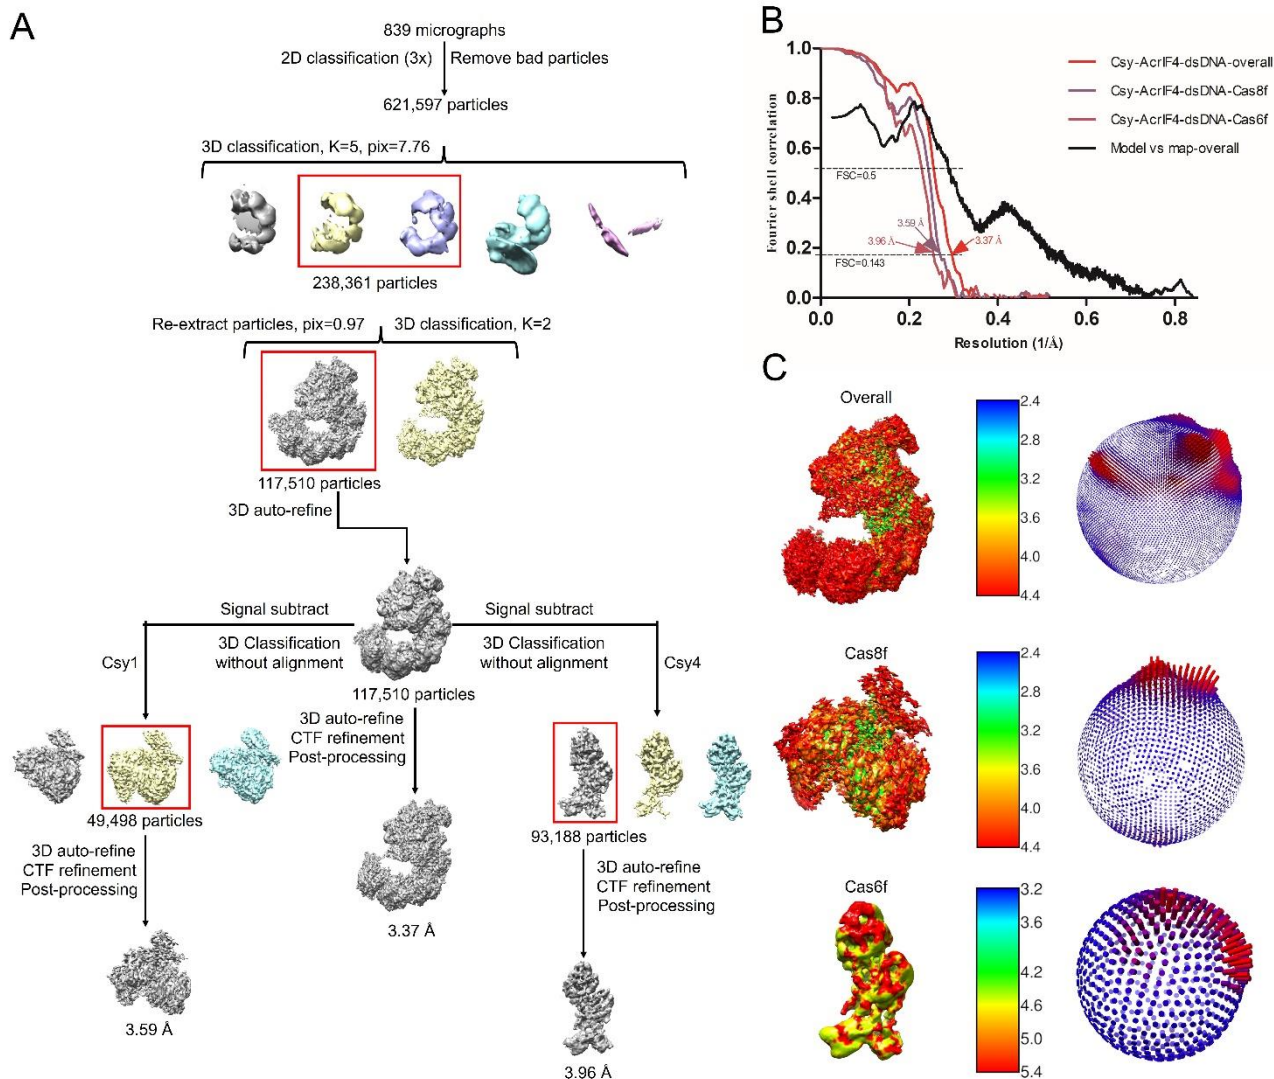

**Figure S3 Cryo-EM image processing for the Csy-AcrIF4-dsDNA complex**

(A) Representative data processing of Csy-AcrIF4-dsDNA complex. 3D classification, signal subtraction, 3D-auto refinement, CTF Refinement and post-processing were performed with subregion of Cas8f and Cas6f in RELION 3.1.

(B) Representative the gold-standard Fourier Shell Correlation (FSC=0.143) curves and model vs map curve (FSC=0.5) of Csy-AcrIF4-dsDNA complex, Cas8f and Cas6f.

(C) Local resolution estimation and particle orientation distributions of the Csy-AcrIF4-dsDNA complex, Cas8f and Cas6f.

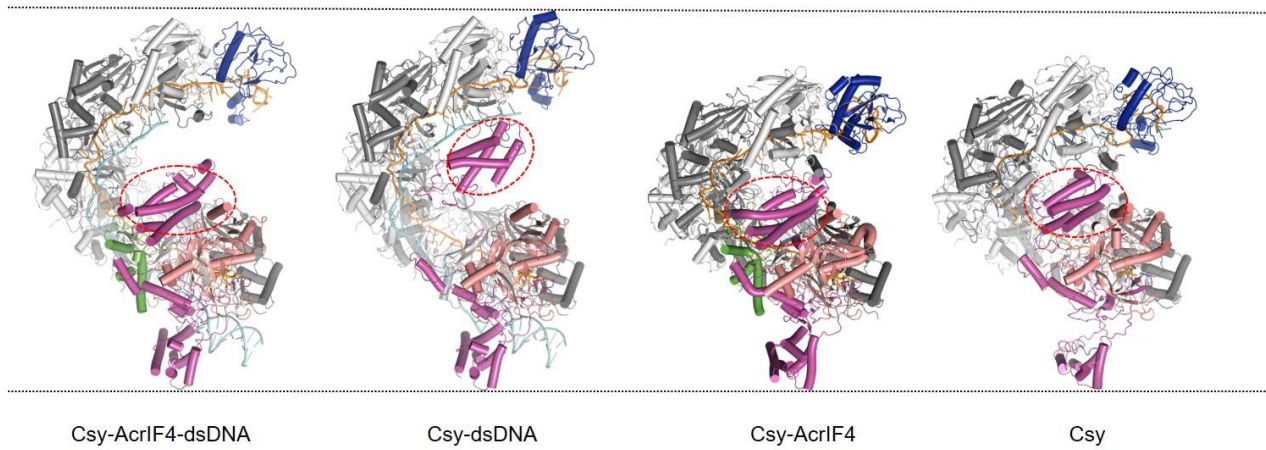

**Figure S4 Side-by-side comparison of the Csy-AcrIF4-dsDNA, Csy-dsDNA, Csy-AcrIF4 and Csy structures**

Side-by-side comparison of the Csy-AcrIF4-dsDNA (this study), Csy-dsDNA (PDB code: 6NE0), Csy-AcrIF4 (PDB code: 7JZW) and Csy (PDB code: 6B45) structures. The Cas8f HB is marked in a circle.

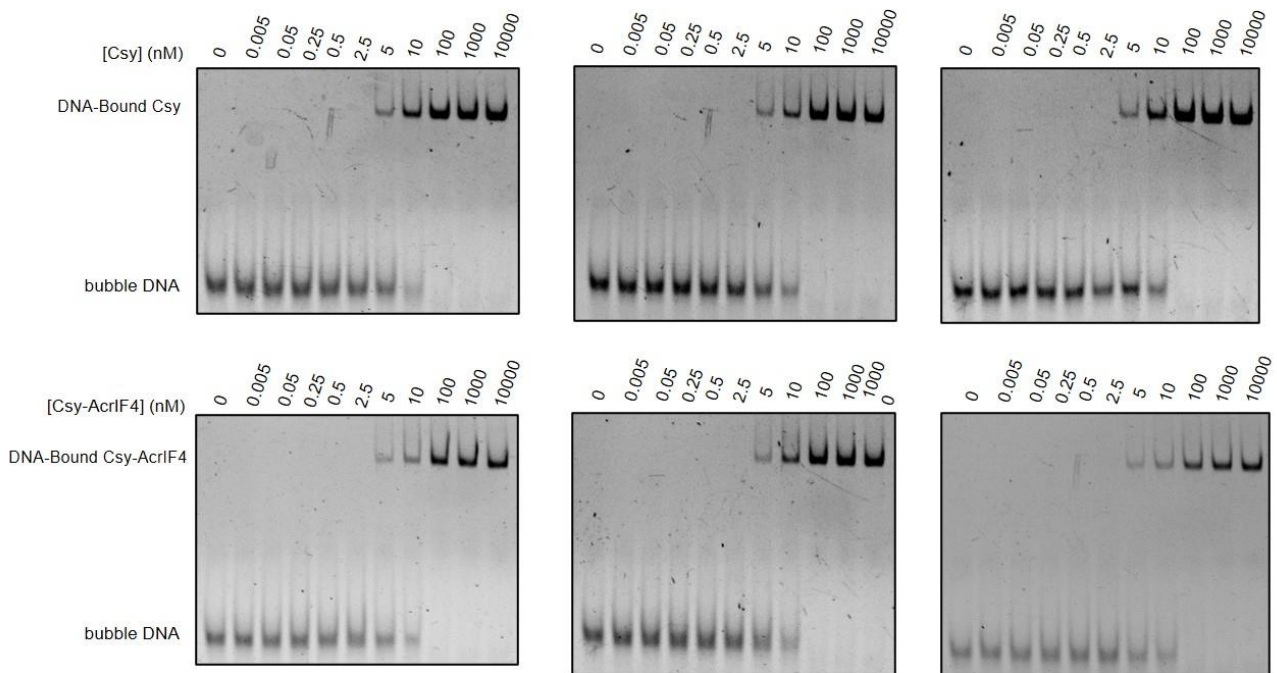

**Figure S5 Binding between bubble dsDNA and the AcrIF4-bound or apo Csy complex**

DNA binding assays were performed by incubating a concentration gradient (0, 0.005, 0.05, 0.25, 0.5, 2.5, 5, 10, 100, 1000, 10000 nM) of the Csy (or Csy-AcrIF4) complex with 16 nM of 54 bp dsDNA bubble (5'-FAM in the TS).

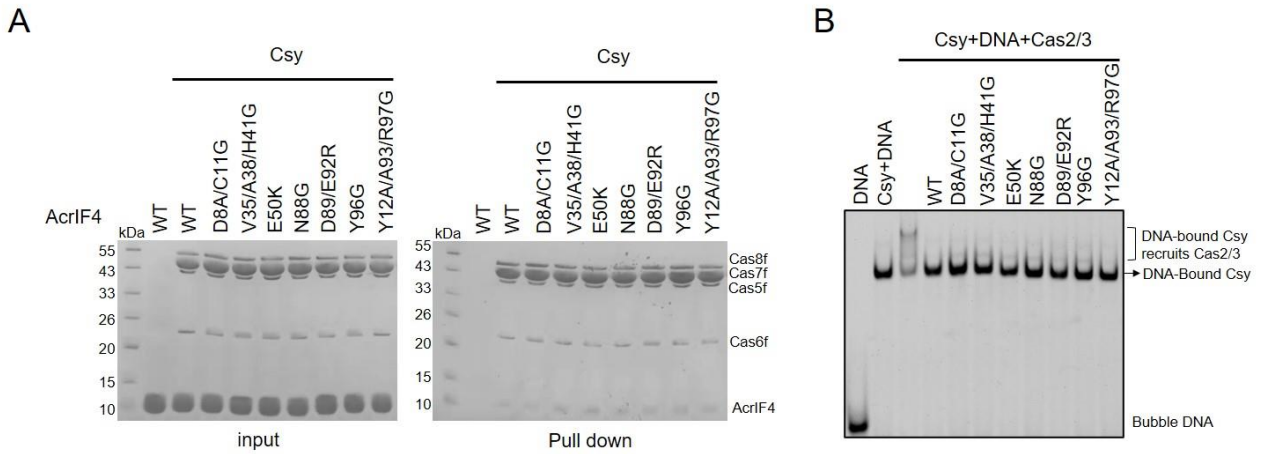

**Figure S6 AcrIF4 mutations on a specific interface do not result in marked Csy binding defect**  
 (A) Reactions were performed with 6  $\mu\text{M}$  Csy complex and 180  $\mu\text{M}$  AcrIF4 or its mutants for 30 min at 37°C, and then the mixtures were incubated with Ni-NTA beads for 30 min at 4°C. Samples of input and pull-down were separated using SDS-PAGE after washing three times.  
 (B) Mutations of the interface residues of AcrIF4 did not affect its inhibition capacity of Cas2/3 recruitment. Reactions were performed with 1.6  $\mu\text{M}$  Csy complex, 0.1  $\mu\text{M}$  54-bp bubble dsDNA (5'-FAM in the target DNA strand), 3.2  $\mu\text{M}$  AcrIF4, and 0.8  $\mu\text{M}$  Cas2/3. Reactions were independently repeated three times with similar results.
